# Supplementary material for: Synaptic zinc potentiates AMPA receptor function in mouse auditory cortex
Source: PubMed Central journal article supplement (PMC10514716; doi:10.1016/j.celrep.2023.112932), 2023-08-15
Supplement: NIHMS1928263-supplement-1.pdf [file NIHMS1928263-supplement-1.pdf]

**Cell Reports, Volume 42**

**Supplemental information**

**Synaptic zinc potentiates AMPA**

**receptor function in mouse auditory cortex**

**Philip T.R. Bender, Mason McCollum, Helen Boyd-Pratt, Benjamin Z. Mendelson, and Charles T. Anderson**

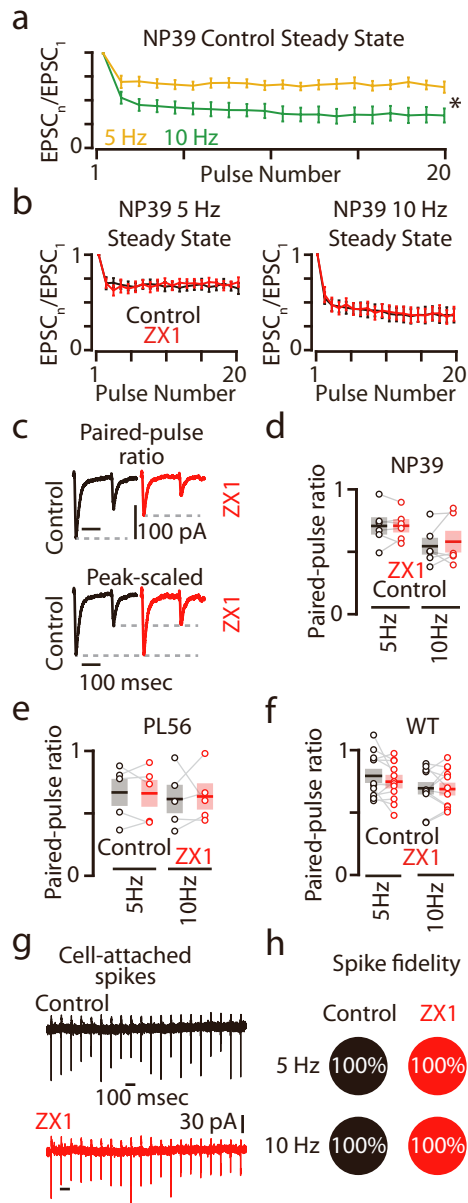

Figure S1

**Figure S1: Endogenous zinc has post-synaptic effects on AMPAR EPSCs. Related to Figures 1, 2, and 4.**

- a)** Average NP39 control AMPAR EPSC steady state along a stimulus train of twenty pulses. Data shown as  $EPSC_n/EPSC_1$ , normalized EPSC amplitudes compared at 5 Hz stimulation (yellow) and 10 Hz stimulation (green). ( $p=0.0029$ ,  $n=6$  cells from six mice. Two-way repeated measures ANOVA.)
- b)** Average NP39 control AMPAR EPSC steady state along a stimulus train of twenty pulses. Data shown as  $EPSC_n/EPSC_1$  Normalized EPSC amplitudes compared at 5 Hz (left) stimulation and 10 Hz stimulation (right) in control (black) and after 100  $\mu$ M ZX1 (red). (5 Hz:  $p=0.6882$ ,  $n=6$  cells from six mice. Two-way repeated measures ANOVA. 10 Hz:  $p=0.7677$ ,  $n=6$  cells from six mice. Two-way repeated measures ANOVA.)
- c)** (Top) Example EPSCs pairs from the same neuron in control (black) and in ZX1 (red). (Bottom) The same traces peaked scaled. Color scheme as in **b**.
- d)** Average effect of ZX1 on paired pulse ratios of NP39 at 5 Hz (left) and 10 Hz (right). (5 Hz:  $p=0.4991$ ,  $n=6$  cells from 4 mice. 10 Hz:  $p=0.6981$ ,  $n=6$  cells from four mice. Paired t-test.). Color scheme as in **b**.
- e)** Average effect of ZX1 on paired pulse ratios of PL56 at 5 Hz (left) and 10 Hz (right). (5 Hz:  $p=0.8770$ ,  $n=5$  cells from 4 mice; 10 Hz:  $p=0.8289$ ,  $n=5$  cells from four mice. Paired t-test). Color scheme as in **b**.
- f)** Average effect of ZX1 on paired pulse ratios of WT at 5 Hz (left) and 10 Hz (right). (5 Hz:  $p=0.6031$ ,  $n=12$  cells from 10 mice. 10 Hz:  $p=0.9223$ ,  $n=12$  cells from ten mice. Paired t-test.). Color scheme as in **b**.
- g)** Example traces showing light-evoked action potentials of a layer 2/3 chronos-expressing neuron recorded in cell-attached mode in control (black) and in ZX1 (red).
- h)** Average light-evoked spike fidelity of layer 2/3 neurons to twenty light pulses at 5 Hz (top) and 10 Hz (bottom) in control (black) and in ZX1 (red).

Asterisks indicate significant p values. Data are represented as mean  $\pm$  SEM. See Table S1 for detailed statistics.

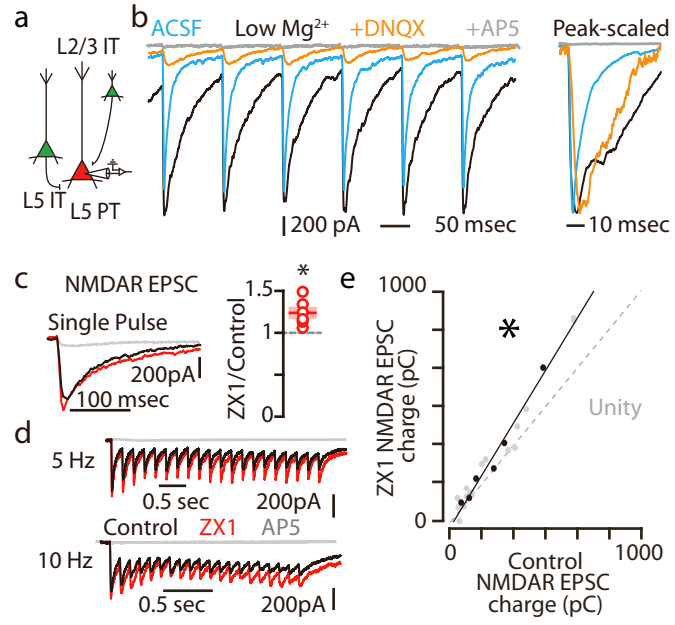

Figure S2

**Figure S2. Synaptic zinc inhibits NMDA receptor function at IT-PT synapses in the auditory cortex. Related to Figures 4 and S3.**

**a)** (Left) Cartoon illustrating presynaptic IT-type neurons expressing chronos (green) and a post synaptic layer 5 neuron expressing CTB-555 (red).

**b)** (Left) Example traces showing averaged EPSCs in response to pulses of blue light. Blue: AMPAR EPSCs in regular ACSF, Black: EPSCs from activation of both AMPAR and NMDAR in low magnesium ACSF. Gold: NMDAR EPSCs in low magnesium ACSF and the AMPAR antagonist DNQX. Gray: EPSC in low magnesium ACSF, DNQX, and the NMDAR antagonist AP5. (Right) Example traces showing peak-scaled EPSCs, highlighting that EPSCs isolated with DNQX in low-magnesium conditions (gold) showed a slower rise time and longer tau than isolated AMPAR EPSCs (blue) consistent with these EPSCs being mediated by NMDARs.

**c)** (Left) Example traces showing averaged NMDAR EPSCs in response to a single pulse of blue light. Black: control EPSC. Red: EPSC after the addition of ZX1. Gray: EPSC after the addition of AP5. (Right) Average effect of ZX1 on the amplitude of NMDAR EPSCs in response to a single pulse of light ( $p=0.0144$ ,  $n=6$  cells from five mice, paired t-test).

**d)** Example averaged EPSCs from trains of light pulses at 5 Hz (top) and 10 Hz (bottom). Color scheme same as in **c**.

**e)** Average effect of ZX1 on the charge of averaged NMDAR EPSCs. Gray: charge of individual EPSCs in response to three light stimulations (single pulse, 5 Hz, and 10 Hz). Black: Average charge of all EPSCs from each neuron ( $p=0.0080$ ,  $n=6$  cells from five mice, grouped t-test). At all stimulation frequencies, we observed a significant increase in the first peak amplitude and charge of NMDAR EPSCs after zinc chelation with ZX1, suggesting that the synaptic zinc concentration is sufficient to inhibit NMDAR EPSCs at the same layer 2/3 IT-PT and layer 5 IT-PT synapses, where it is also able to potentiate AMPAR EPSCs (Figure 4).

Asterisks indicate significant p values. Data are represented as mean  $\pm$  SEM. See Table S1 for detailed statistics.

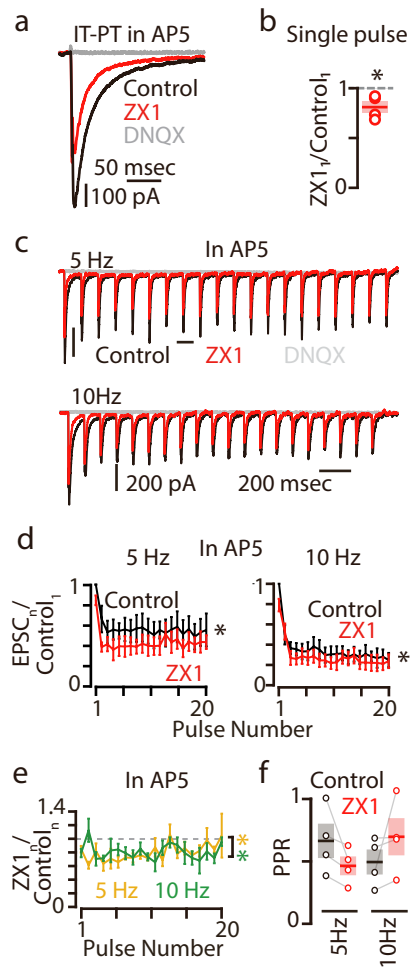

Figure S3

**Figure S3. AMPA receptor function enhancement by synaptic zinc does not depend on NMDA receptor signaling. Related to Figures 4 and S2.**

**a)** Example traces showing average AMPAR EPSCs in response to a single pulse of blue light in the presence of the NMDAR antagonist AP5. Black: control EPSC. Red: EPSC after the addition of ZX1. Gray: EPSC after the addition of the AMPAR antagonist DNQX.

**b)** Average effect of ZX1 on the average amplitude of AMPAR EPSCs in response to a single pulse of light in the presence of AP5 ( $p=0.0486$ ,  $n=4$  cells from four mice, paired t-test). Color scheme as in **a**.

**c)** Example average EPSCs from trains of light pulses at 5 Hz (top) and 10 Hz (bottom). Color scheme as in **a**.

**d)** Average effect of ZX1 on the average amplitude of AMPAR EPSCs normalized to the first EPSC amplitude in response to trains of light pulses at 5 Hz (left) and 10 Hz (right) (5 Hz:  $p=0.0276$ ,  $n=4$  cells from four mice; 10 Hz:  $p=0.0183$ ,  $n=4$  cells from four mice; 2-way repeated measures ANOVAs). Color scheme as in **a**.

**e)** Average effect of ZX1 on the average amplitude of AMPAR EPSCs normalized to the amplitude of each corresponding control EPSC in response to trains of light pulses at 5 Hz (yellow) and 10 Hz (green) (5 Hz:  $p=0.0135$ ,  $n=4$  cells from four mice; 10 Hz:  $p=0.0319$ ,  $n=4$  cells from four mice; 2-way repeated measures ANOVAs).

**f)** Average effect of ZX1 on paired pulse ratios at 5 Hz (left) and 10 Hz (right). Color scheme as in **a**.

Asterisks indicate significant p values. Data are represented as mean  $\pm$  SEM. See Table S1 for detailed statistics.

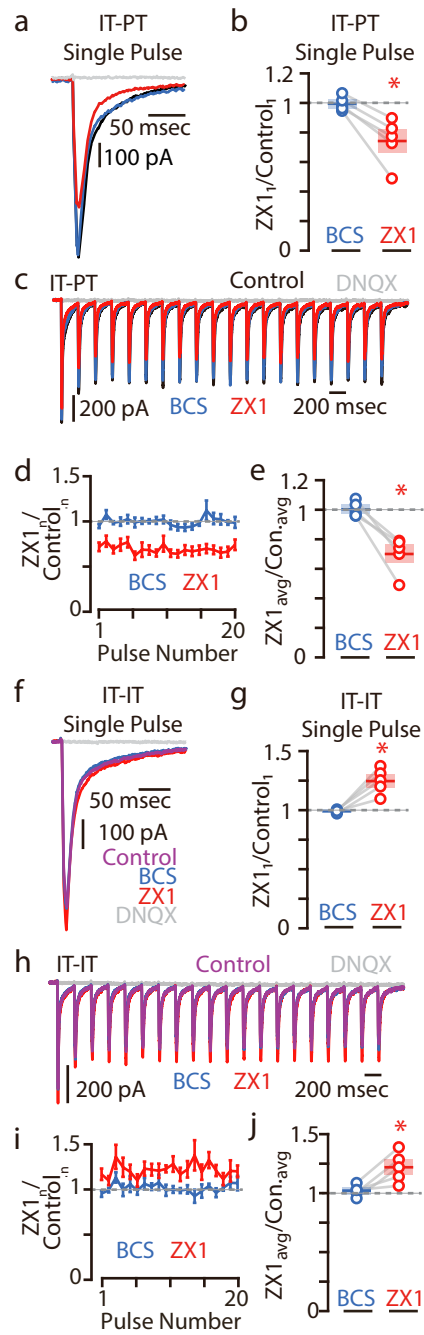

Figure S4



**Figure S4. Copper does not modulate AMPAR EPSC function or occlude the effects of ZX1 at IT-IT or IT-PT synapses. Related to Figures 3 and 4.**

**a)** Example traces showing average AMPAR EPSCs in response to a single pulse of blue light at IT-PT synapses. Black: control EPSC. Blue: EPSC in the presence of BCS. Red: EPSC in the presence of BCS and ZX1. Gray: EPSC after the addition of DNQX.

**b)** Average effect of BCS and subsequent addition of ZX1 on the average amplitude of IT-PT AMPAR EPSCs in response to a single pulse of light (BCS:  $p=0.8146$ ,  $n=5$  cells from five mice; ZX1:  $p=0.0061$ ,  $n=5$  cells from five mice, paired t-test). Color scheme as in **a**.

**c)** Example average EPSCs from trains of light pulses at IT-PT synapses. Color scheme as in **a**.

**d)** Average effect of ZX1 on the average amplitude of IT-PT AMPAR EPSCs normalized to the amplitude of each corresponding control EPSC in response to trains of light pulses after the addition of BCS and the subsequent addition of ZX1. Color scheme as in **a**.

**e)** Average effect of ZX1 on the amplitude of average IT-PT AMPAR EPSCs in response to a stimulus blue light normalized to the corresponding control EPSC after the addition of BCS and the subsequent addition of ZX1 (BCS:  $p=0.9248$ ,  $n=5$  cells from five mice; ZX1:  $p=0.94647e-4$ ,  $n=5$  cells from five mice. Paired t-test.) Color scheme as in **a**.

**f)** Example traces showing average AMPAR EPSCs in response to a single pulse of blue light in the presence of BCS and ZX1 recorded from IT-IT synapses. Magenta: control EPSC. Blue: EPSC in the presence of BCS. Red: EPSC in the presence of BCS and ZX1. Gray: EPSC after the addition of DNQX.

**g)** Average effect of BCS and subsequent addition of ZX1 on the average amplitude of IT-IT AMPAR EPSCs in response to a single pulse of light (BCS:  $p=0.1640$ ,  $n=5$  cells from five mice; ZX1:  $p=0.0109$ ,  $n=5$  cells from five mice. Paired t-test). Color scheme as in **f**.

**h)** Example average EPSCs from trains of light pulses at IT-IT synapses. Color scheme as in **f**.

**i)** Average effect of ZX1 on the average amplitude of IT-IT AMPAR EPSCs normalized to the amplitude of each corresponding control EPSC in response to trains of light pulses after the addition of BCS and the subsequent addition of ZX1. Color scheme as in **f**.

**j)** Average effect of ZX1 on the amplitude of average IT-IT AMPAR EPSCs in response to a stimulus blue light normalized to the corresponding control EPSC after the addition of BCS and the subsequent addition of ZX1 (BCS:  $p=0.4518$ ,  $n=5$  cells from five mice; ZX1:  $p=0.0061$ ,  $n=5$  cells from five mice. Paired t-test.) Color scheme as in **f**.

Asterisks indicate significant p values. Data are represented as mean  $\pm$  SEM. See Table S1 for detailed statistics.

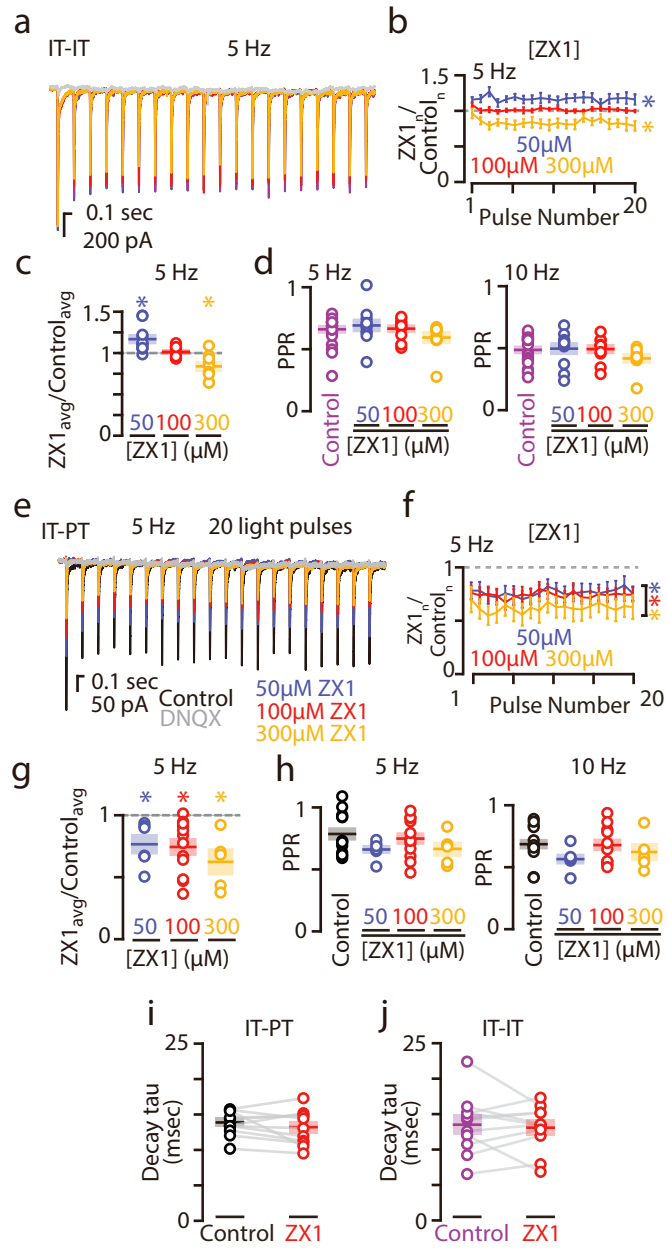

Figure S5

**Figure S5. Synaptic zinc has different potentiating effects on IT-IT synapses and IT-PT synapses at 5 Hz stimulation with no change in PPR. ZX1 does not affect AMPA receptor decay kinetics at IT-PT or IT-IT synapses. Related to Figure 5.**

**a)** Example average IT-IT EPSCs from trains of light pulses at 10 Hz. Magenta: control EPSC. Purple: EPSC after the addition of 50  $\mu\text{M}$  ZX1. Red: EPSC after the addition of 100  $\mu\text{M}$  ZX1. Gold: EPSC after the addition of 300  $\mu\text{M}$  ZX1. Gray: EPSC after the addition of DNQX.

**b)** Average effect of ZX1 on the average amplitude of IT-IT AMPAR EPSCs, normalized to the corresponding control EPSC amplitudes in response to trains of light pulses at 5 Hz. (50  $\mu\text{M}$  ZX1:  $p=0.0045$ ,  $n=11$  cells from nine mice; 100  $\mu\text{M}$  ZX1:  $p=0.3624$ ,  $n=11$  cells from ten mice; 300  $\mu\text{M}$  ZX1:  $p=0.0114$ ,  $n=9$  cells from nine mice. 2-way repeated measures ANOVA.) Color scheme same as **a**.

**c)** Average effect of ZX1 on the average amplitude of IT-IT AMPAR EPSCs in response to a 5 Hz stimulus train of blue light normalized to the corresponding control EPSC along the train at each concentration of ZX1 (50  $\mu\text{M}$  ZX1:  $p=0.0045$ ,  $n=11$  cells from nine mice; 100  $\mu\text{M}$  ZX1:  $p=0.3624$ ,  $n=11$  cells from nine mice; 300  $\mu\text{M}$  ZX1:  $p=0.0114$ ,  $n=9$  cells from nine mice. Paired t-test.) Color scheme same as **a**.

**d)** Average effect of ZX1 on paired pulse ratios at 5 Hz (left) and 10 Hz (right) at IT-IT synapses. (5 Hz: Control:  $n=21$  cells from nineteen mice; 50  $\mu\text{M}$ :  $p=0.5201$ ,  $n=11$  cells from nine mice; 100  $\mu\text{M}$ :  $p=0.8052$ ,  $n=11$  cells from ten mice; 300  $\mu\text{M}$ :  $p=0.0948$ ,  $n=9$  cells from nine mice. 10 Hz: Control  $n=21$  cells from nineteen mice; 50  $\mu\text{M}$ :  $p=0.8260$ ,  $n=11$  cells from nine mice; 100  $\mu\text{M}$ :  $p=0.8731$ ,  $n=11$  cells from ten mice; 300  $\mu\text{M}$ :  $p=0.1270$ ,  $n=9$  cells from nine mice. Paired t-test) Color scheme same as **a**.

**e)** Example average IT-PT EPSCs from trains of light pulses at 5 Hz. Black: control EPSC. Purple: EPSC after the addition of 50  $\mu\text{M}$  ZX1. Red: EPSC after the addition of 100  $\mu\text{M}$  ZX1. Gold: EPSC after the addition of 300  $\mu\text{M}$  ZX1. Gray: EPSC after the addition of DNQX.

**f)** Average effect of ZX1 on the amplitude of average IT-PT AMPAR EPSCs normalized to the corresponding control EPSC amplitudes in response to trains of light pulses at 5 Hz. (50  $\mu\text{M}$  ZX1:  $p=0.0205$ ,  $n=6$  cells from six mice; 100  $\mu\text{M}$  ZX1:  $p=0.0014$ ,  $n=12$  cells from ten mice; 300  $\mu\text{M}$  ZX1:  $p=0.0181$ ,  $n=5$  cells from five mice. 2-way repeated measures ANOVA.) Color scheme same as **e**.

**g)** Average effect of ZX1 on the amplitude of average IT-PT AMPAR EPSCs in response to a stimulus train of blue light normalized to the corresponding control EPSC along the train at each concentration of ZX1 (50  $\mu\text{M}$  ZX1:  $p=0.0205$ ,  $n=6$  cells from six mice; 100  $\mu\text{M}$  ZX1:  $p=0.0014$ ,  $n=12$  cells from ten mice; 300  $\mu\text{M}$  ZX1:  $p=0.0181$ ,  $n=5$  cells from five mice. Paired t-test.) Color scheme same as **e**.

**h)** Average effect of ZX1 on paired pulse ratios at 5 Hz (left) and 10 Hz (right) at IT-PT synapses. (5 Hz: Control: n=13 cells from eleven mice; 50  $\mu$ M: p=0.0415, n=6 cells from six mice; 100  $\mu$ M: p=0.5738, n=12 cells from ten mice; 300  $\mu$ M: p=0.1284, n=5 cells from five mice. 10 Hz: Control: n=13 cells from eleven mice; 50  $\mu$ M: p=0.0506, n=6 cells from six mice; 100  $\mu$ M: p=0.9145, n=12 cells from ten mice; 300  $\mu$ M: p=0.4219, n=5 cells from five mice. Unpaired t-test.) Color scheme same as in **e**.

**i)** Average AMPA receptor decay tau at IT-PT synapses. Control (black) compared to post-ZX1 (red). (p=0.2200, n=12 cells from ten mice; paired t-test).

**j)** Average AMPA receptor decay tau at IT-IT synapses. Control (magenta) compared to post-ZX1 (red). (p=0.6510, n=11 cells from ten mice; paired t-test).

Data from Figure 4g are used in Figure S4f. Asterisks indicate significant p values. Data are represented as mean  $\pm$  SEM. See Table S1 for detailed statistics.

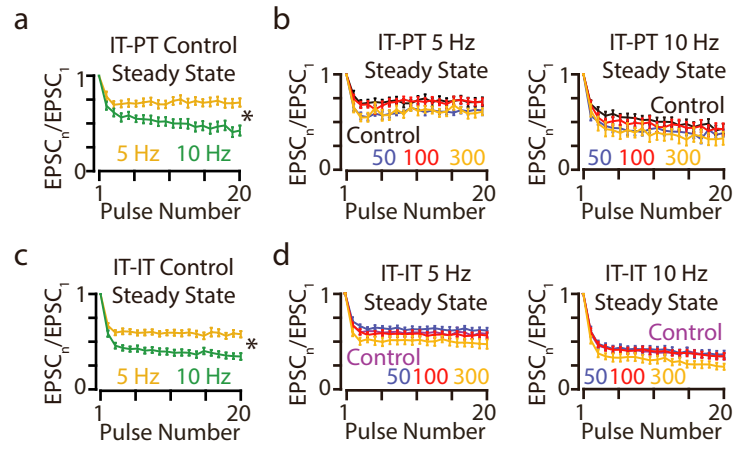

Figure S6

**Figure S6. ZX1 does not alter the frequency-dependent steady-state depression of AMPA EPSC trains at IT-PT or IT-IT synapses. Related to Figures 5 and S5.**

**a)** Average IT-PT control AMPAR EPSC steady state along a stimulus train. Normalized EPSC amplitudes at 5 Hz stimulation (yellow) compared to 10 Hz stimulation (green). ( $p=2.901e-7$ ,  $n=13$  cells from twelve mice. Two-way repeated measures ANOVA.)

**b)** Average IT-PT control AMPAR EPSC amplitudes at 5 Hz (left) comparing 50  $\mu\text{M}$  ZX1 (purple), 100  $\mu\text{M}$  ZX1 (red), and 300  $\mu\text{M}$  ZX1 (gold). (5 Hz: Control:  $n=13$  cells from twelve mice. 50  $\mu\text{M}$  ZX1:  $p=0.0574$ ,  $n=6$  cells from six mice. 100  $\mu\text{M}$  ZX1:  $p=0.8273$ ,  $n=12$  cells from twelve mice. 300  $\mu\text{M}$  ZX1:  $p=0.1202$ ,  $n=5$  cells from five mice. Two-way repeated measures ANOVA.) (Right) Average IT-PT control AMPAR EPSC amplitudes at 10 Hz comparing 50  $\mu\text{M}$  ZX1 (purple), 100  $\mu\text{M}$  ZX1 (red), and 300  $\mu\text{M}$  ZX1 (gold). (10 Hz: Control:  $n=13$  cells from twelve mice. 50  $\mu\text{M}$  ZX1:  $p=0.1148$ ,  $n=6$  cells from six mice. 100  $\mu\text{M}$  ZX1:  $p=0.5722$ ,  $n=12$  cells from twelve mice. 300  $\mu\text{M}$  ZX1:  $p=0.1234$ ,  $n=5$  cells from five mice. Two-way repeated measures ANOVA.)

**c)** Average IT-IT control AMPAR EPSC steady state along a stimulus train of twenty pulses. Data shown as  $\text{EPSC}_n/\text{EPSC}_1$ , normalized EPSC amplitudes compared at 5 Hz stimulation (gold) and 10 Hz stimulation (green). ( $p=1.9159e-11$ ,  $n=22$  cells from twenty mice. Two-way repeated measures ANOVA.)

**d)** Average IT-PT control AMPAR EPSC amplitudes at 5 Hz (left) comparing 50  $\mu\text{M}$  ZX1 (purple), 100  $\mu\text{M}$  ZX1 (red), and 300  $\mu\text{M}$  ZX1 (gold). (5 Hz: Control:  $n=22$  cells from twenty mice. 50  $\mu\text{M}$  ZX1:  $p=0.3742$ ,  $n=12$  cells from eleven mice. 100  $\mu\text{M}$  ZX1:  $p=0.7365$ ,  $n=12$  cells from twelve mice. 300  $\mu\text{M}$  ZX1:  $p=0.0892$ ,  $n=10$  cells from nine mice. Two-way repeated measures ANOVA.) Average IT-PT control AMPAR EPSC amplitudes at 10 Hz comparing 50  $\mu\text{M}$  ZX1 (purple), 100  $\mu\text{M}$  ZX1 (red), and 300  $\mu\text{M}$  ZX1 (gold). (10 Hz: Control:  $n=22$  cells from twenty mice. 50  $\mu\text{M}$  ZX1:  $p=0.7440$ ,  $n=12$  cells from eleven mice. 100  $\mu\text{M}$  ZX1:  $p=0.9624$ ,  $n=12$  cells from twelve mice. 300  $\mu\text{M}$  ZX1:  $p=0.3489$ ,  $n=10$  cells from nine mice. Two-way repeated measures ANOVA.)

Asterisks indicate significant p values. Data are represented as mean  $\pm$  SEM. See Table S1 for detailed statistics.

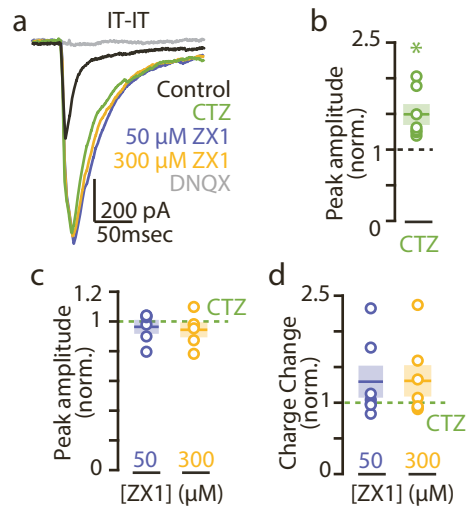

Figure S7

**Figure S7. Cyclothiazide blocks the differential enhancement of AMPA receptor function by synaptic zinc at IT-IT synapses. Related to Figure 5.**

**a)** Example traces showing average AMPAR EPSCs in response to a single pulse of blue light. Black: control EPSC. Green: EPSC after the addition of AMPAR agonist cyclothiazide (CTZ). Purple: EPSC after the addition of 50  $\mu$ M ZX1. Gold: EPSC after the addition of 300  $\mu$ M ZX1. Gray: EPSC after the addition of DNQX.

**b)** Average effect of CTZ (green) on the amplitude of average AMPAR EPSCs in response to a single pulse of light ( $p=0.00095$ ,  $n=7$  cells from six mice; paired t-test).

**c)** Average effect of ZX1 on the amplitude of average AMPAR EPSCs in CTZ in response to a single pulse of light. (50  $\mu$ M ZX1 (purple) vs. CTZ (green):  $p=0.4227$ ,  $n=7$  cells from six mice. Unpaired t-test. 300 $\mu$ M ZX1 (gold) vs. CTZ:  $p=0.2638$ ,  $n=7$  cells from six mice. Unpaired t-test.)

**d)** Average effect of ZX1 on the charge of average AMPAR EPSCs in CTZ to trains of light pulses. (50  $\mu$ M ZX1 (purple) vs. CTZ(green):  $p=0.1885$ ,  $n=7$  cells from six mice. Paired t-test. 300 $\mu$ M ZX1 (gold) vs. CTZ:  $p=0.1950$ ,  $n=7$  cells from six mice. Paired t-test.)

Asterisks indicate significant p values. Data are represented as mean  $\pm$  SEM. See Table S1 for detailed statistics.
